# Supplementary material
Source: PubMed Central journal article supplement (PMC4434715)
Supplement: pnas.201505289SI.pdf [file pnas.201505289SI.pdf]

# Supporting Information

Dwyer et al. 10.1073/pnas.1505289112

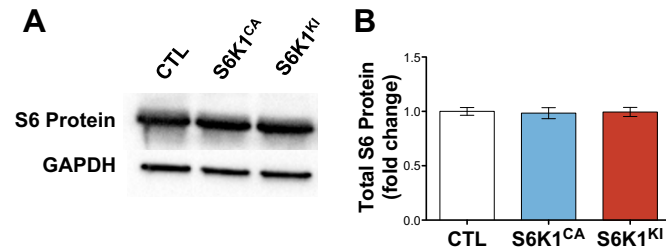

**Fig. S1.** Western blot analysis of HEK293 cells transfected with control, S6K1<sup>CA</sup>, or S6K1<sup>KI</sup> plasmids. Lysates were collected 48 h after transfection. (A) Representative blots of S6 protein and GAPDH. (B) Neither S6K1<sup>CA</sup> nor S6K1<sup>KI</sup> influenced expression of total S6 protein levels.  $n = 4$  cultures per group. Error bars represent mean  $\pm$  SEM.

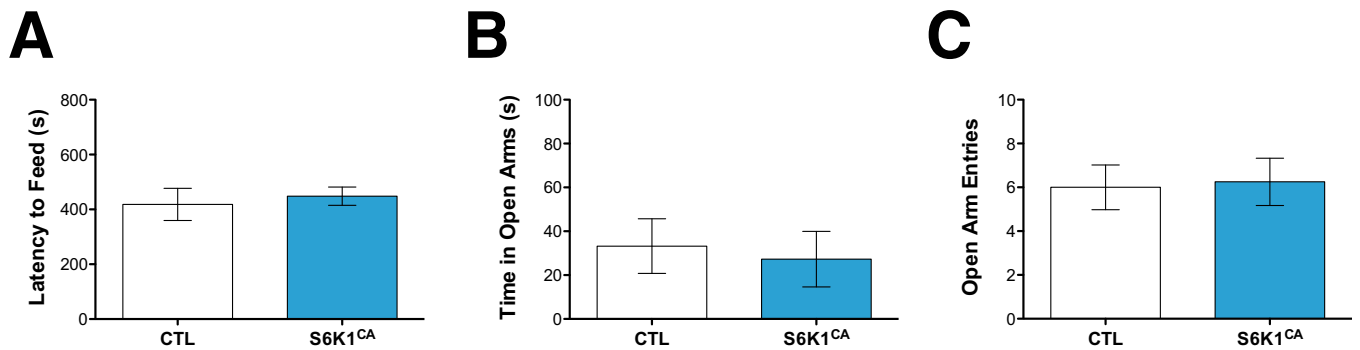

**Fig. S2.** Increased S6K1 activity in the mPFC does not affect anxiety-related behavior. (A) S6K1<sup>CA</sup> did not affect latency to feed in the novelty-suppressed feeding test. (B and C) S6K1<sup>CA</sup> did not affect time spent in the open arms (B) or entries into the open arms in the elevated plus maze (C). Error bars represent mean  $\pm$  SEM.

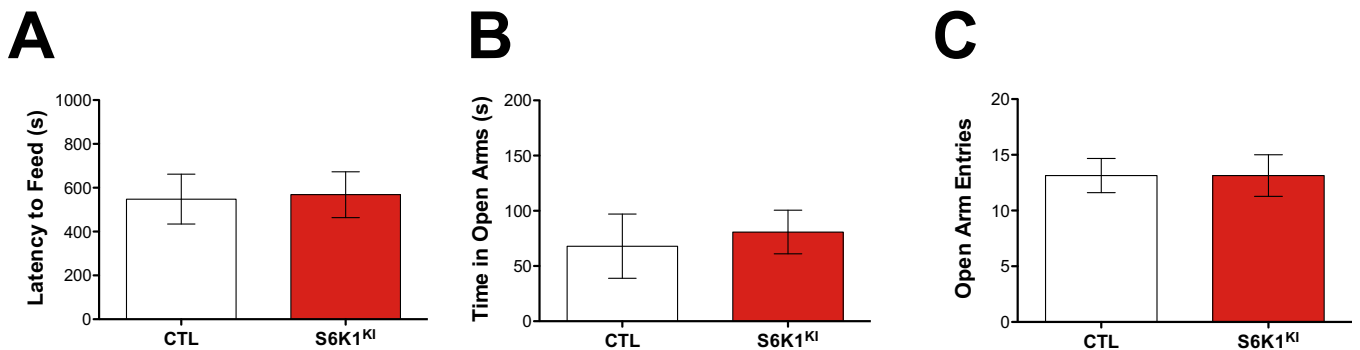

**Fig. S3.** Decreased S6K1 activity in the mPFC does not affect anxiety-related behavior. (A) S6K1<sup>KI</sup> did not affect latency to feed in the novelty-suppressed feeding test. (B and C) S6K1<sup>KI</sup> did not affect time spent in the open arms (B) or entries into the open arms in the elevated plus maze (C). Error bars represent mean  $\pm$  SEM.

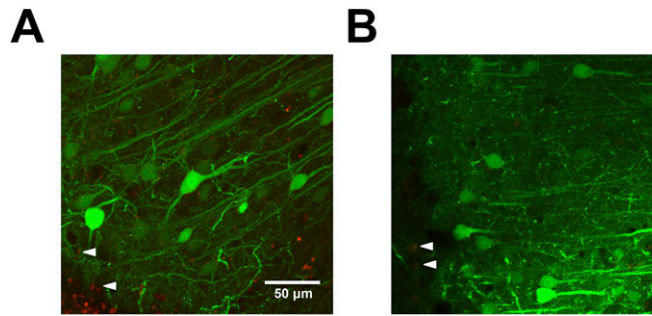

**Fig. 54.** Confocal Z-stack images of cleaved Caspase 3 (red) and eGFP (green) from S6K1<sup>Kl</sup>-infected mPFC tissue of rats (20×). Virus expression did not induce Caspase 3 activation, a cellular marker of apoptosis in (A) control- or (B) S6K1<sup>Kl</sup>-positive neurons. Moreover, the GFP-labeled neurons in the control and active virus are similar, with normal dendrite arbor and processes. Arrows indicate Caspase 3 positive cells.
